# Supplementary material
Source: publisher figshare collection journal article supplement (https://sage.figshare.com/ndownloader/files/16406882)

## Appendix A. Descriptive Statistics

Table A.1. Descriptive Statistics for Variables Used in Model

|                                                   | Count | Mean     | Standard<br>Deviation | Min | Max |
|---------------------------------------------------|-------|----------|-----------------------|-----|-----|
| Voting on GE and AH Bonds<br>(Dependent Variable) | 2487  | 1.910826 | 1.285124              | 0   | 3   |
| Views toward the “undeserving poor”               | 2217  | 2.0333   | 1.78879               | 0   | 6   |
| GE Bond Spend More                                | 2375  | .1254424 | .3312897              | 0   | 1   |
| GE Bond Spend Less                                | 2375  | .4248553 | .4944251              | 0   | 1   |
| AH Bond Spend More                                | 2356  | .1264712 | .3324502              | 0   | 1   |
| AH Bond Spend Less                                | 2356  | .4803149 | .4997184              | 0   | 1   |
| Climate Change Concern                            | 2371  | 2.053825 | 1.108712              | 0   | 3   |
| Population Concern                                | 2284  | 1.608411 | 1.028707              | 0   | 3   |
| Government Involvement in the<br>Economy          | 2320  | 1.409439 | 1.057464              | 0   | 3   |
| Building Homes Effect on Economy                  | 2291  | 1.585271 | .9988304              | 0   | 3   |
| Price of Housing                                  | 2302  | 1.992145 | .9105158              | 0   | 3   |
| Trust in Government                               | 2342  | 1.124301 | .9569981              | 0   | 3   |
| Family Financial Struggles                        | 2336  | 1.514322 | 1.046882              | 0   | 3   |
| Effect of Increase in Housing Prices              | 2351  | 1.752867 | .9028548              | 0   | 3   |
| Party ID (5 point)                                | 2432  | 2.377878 | 1.568349              | 0   | 4   |
| Trump Vote                                        | 2663  | .3892642 | .487675               | 0   | 1   |
| Female                                            | 2451  | .4830205 | .4998136              | 0   | 1   |
| Homeowner                                         | 2439  | .6603562 | .4736854              | 0   | 1   |
| Income (5 point)                                  | 2317  | 2.082748 | 1.577658              | 0   | 4   |
| Education (5 point)                               | 2455  | 1.979773 | 1.201689              | 0   | 4   |
| Age (5 point)                                     | 2455  | 2.147736 | 1.331292              | 0   | 4   |
| Hispanic                                          | 2429  | .1159461 | .3202262              | 0   | 1   |
| Black                                             | 2429  | .0748909 | .2632694              | 0   | 1   |
| Asian                                             | 2429  | .0373564 | .1896727              | 0   | 1   |
| Native American                                   | 2429  | .0176446 | .1316829              | 0   | 1   |
| Other Non-White                                   | 2429  | .0125495 | .1113424              | 0   | 1   |
| Precinct Percent White                            | 2723  | .7709113 | .2999353              | 0   | 1   |
| Precinct Median Income                            | 2723  | .4142128 | .2200316              | 0   | 1   |
| Precinct Percent College Degree                   | 2723  | .4097628 | .2448175              | 0   | 1   |

## Appendix B: Bond Measures: Section of the Sample Ballot with the Two Bond Questions

### **6. GREEN ECONOMY BONDS - \$35,000,000**

For environmental and recreational purposes, to be allocated as follows:

- (a) Historic State Park Development Program \$4,000,000
- (b) State Land Acquisition Program \$4,000,000
- (c) State Bikeway Development Program \$10,000,000
- (d) Brownfield Remediation and Economic Development \$5,000,000
- (e) Stormwater Pollution Prevention Program \$3,000,000
- (f) Local Recreation Development Matching Grant Program \$5,000,000
- (g) Local Land Acquisition Matching Grant Program \$4,000,000

- ☐ Approve
- ☐ Reject

### **7. HOUSING OPPORTUNITY BONDS - \$50,000,000**

For affordable housing, urban revitalization, and blight remediation, to be allocated as follows:

- (a) Affordable Housing Development \$40,000,000
- (b) Urban Revitalization and Blight Remediation \$10,000,000

- ☐ Approve
- ☐ Reject

Appendix C. Marginal Effects for Control Variables

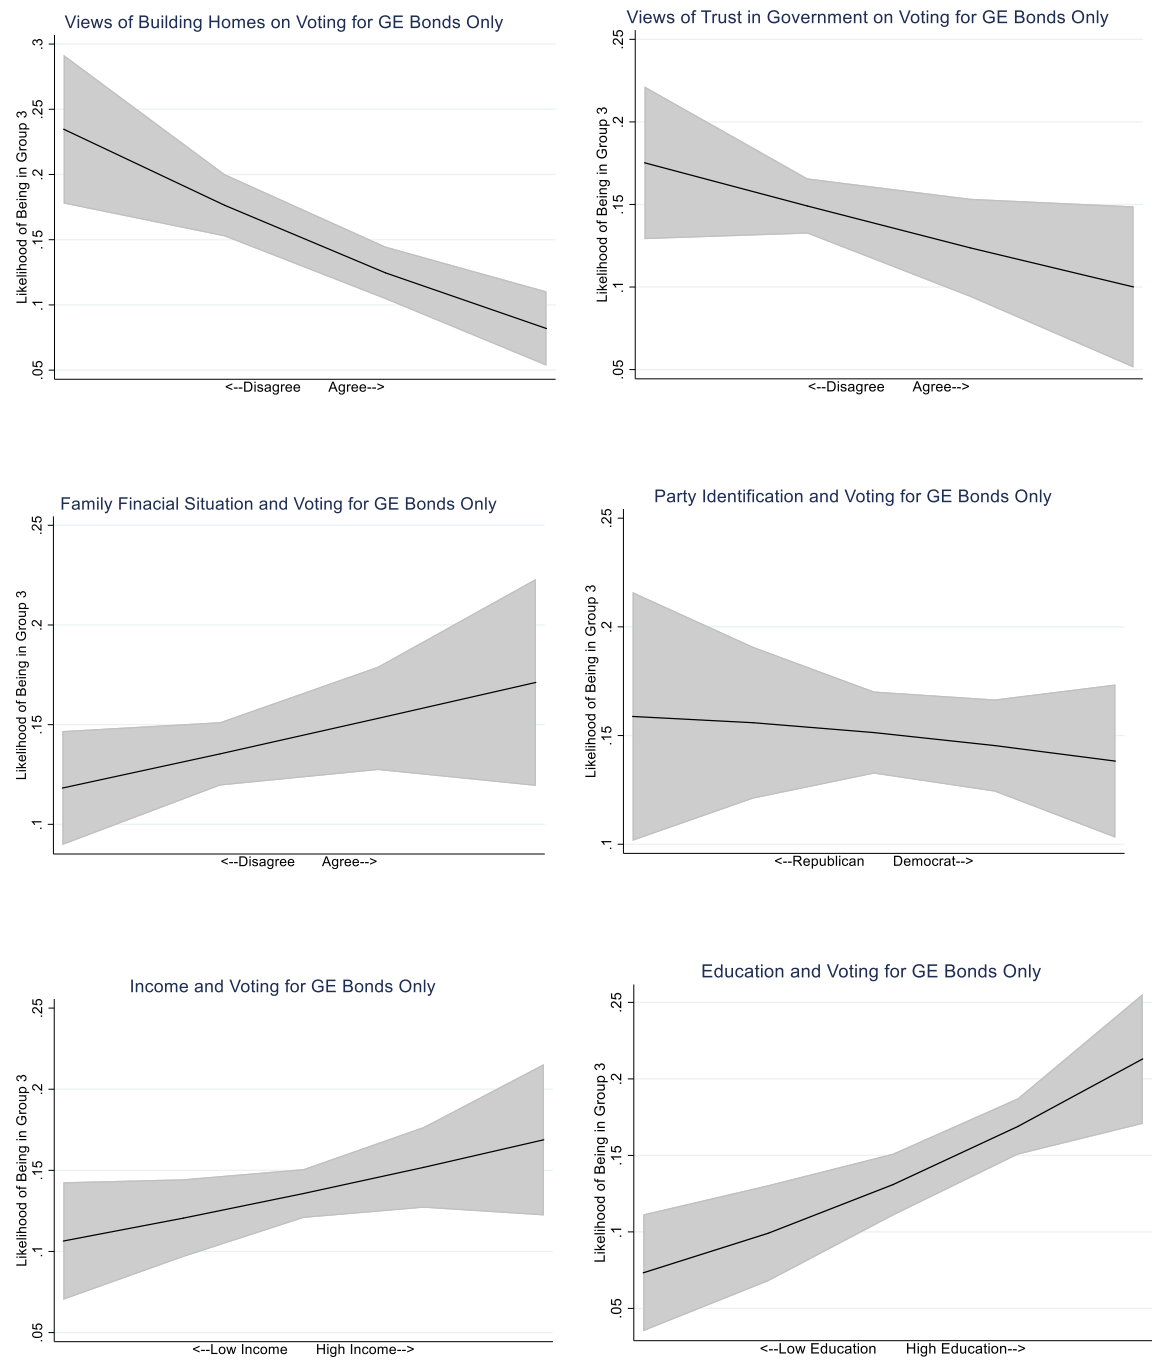

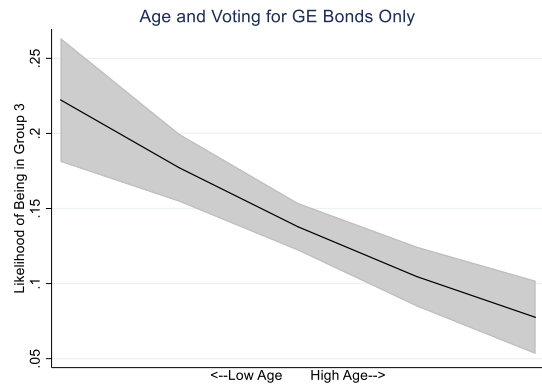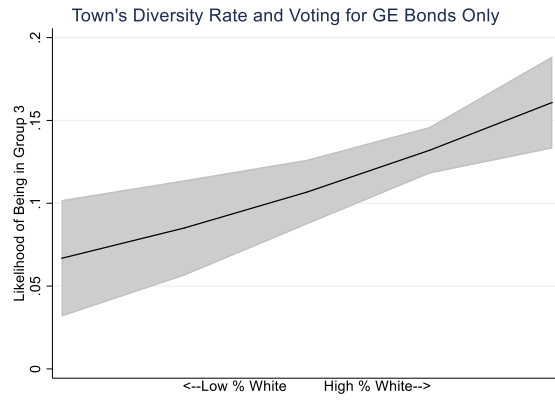

Supplement: Supplementary file 1 [file 16406882]
